# Supplementary material for: Analysis of citation trends to identify articles on delirium worth reading using DDPP model with temporal heatmaps (THM): A bibliometric analysis
Source: PubMed Central journal article supplement — Medicine (Baltimore). 2023 Feb 22;102(8):e32955. doi: 10.1097/MD.0000000000032955 (PMC11309675; doi:10.1097/md.0000000000032955), 2023-02-22
Supplement: medi-102-e32955-s002.pdf [file medi-102-e32955-s002.pdf]

根據依據: 出版年分: 2022 or 2021 or 2020 or 2019 or 2018 or 2017 or 2016 or 2015 or 2014 or 2013 X 文獻類型: Article or Review Article X 全部清除

複製查詢結果連結

出版品 您可能也會喜歡...

限縮結果

在結果內檢索...

依勾選清單篩選

快速篩選

- 高被引論文 123
- 熱門論文 4
- Review Article 1,979
- Early Access 221
- 開放取用 6,082
- 被引參考文獻深度分析 1,929

Citation Topics 中觀主題

0/11,668 新增至勾選清單 匯出 排序依據: 引用次數: 最高優先

1 / 234

1 Clinical Practice Guidelines for the Management of Pain, Agitation, and Delirium in Adult Patients in the Intensive Care Unit 2,093 引用文獻

Barr, J; Fraser, GJ; (...); Jaeschke, R 472 參考文獻

Jan 2013 | CRITICAL CARE MEDICINE 41 (1), pp.263-306

Objective: To revise the "Clinical Practice Guidelines for the Sustained Use of Sedatives and Analgesics in the Critically Ill Adult" published in Critical Care Medicine in 2002. Methods: The American College of Critical Care Medicine assembled a ... 顯示更多

出版商的全文 ... 相關記錄 ?

2 American Geriatrics Society 2015 Updated Beers Criteria for Potentially Inappropriate Medication Use in Older Adults 2,047 引用文獻

Web of Science 領域

- Geriatrics Gerontology 1,560
- Medicine General Internal 1,523
- Psychiatry 1,192
- Critical Care Medicine 1,153
- Anesthesiology 1,150

查看全部 >

TS="delirium" or AB=" delirium" or TI="delirium ")

|    | A          | B      | C  | D           | E           | F                       | G                                | H  | I       | J       | K | L                                | M       | N |
|----|------------|--------|----|-------------|-------------|-------------------------|----------------------------------|----|---------|---------|---|----------------------------------|---------|---|
| 1  | Times Cite | Volume | SO | PT          | Authors     | Author Fu               | TI                               | LA | country | Country |   | Command                          | regions |   |
| 2  | 685        | 2017   |    | Correll, Ch | Correll, CU | Correll, Christoph U.   | Correll, Christoph U. (New York) |    |         |         |   | [Correll, C] Correll, CU (通訊作者)  | Cal     |   |
| 3  | 634        | 2019   |    | Huang, YL   | Huang, YC   | Huang, Yueqin; Wang     | Huang, Yueqin(Beijing)           |    |         |         |   | [Huang, Y] Huang, YQ (通訊作者)      |         |   |
| 4  | 522        | 2020   |    | Moreno, C   | Moreno, C   | Moreno, Carmen; Wy      | Moreno, Carmen(Spain)            |    |         |         |   | [Moreno, C] Moreno, C (通訊作者)     |         |   |
| 5  | 437        | 2017   |    | Hjorthoj, C | Hjorthoj, C | Hjorthoj, Carsten; Stu  | Hjorthoj, Carsten(Denmark)       |    |         |         |   | [Hjorthoj, C] Hjorthoj, C (通訊作者) |         |   |
| 6  | 426        | 2020   |    | Troyer, En  | Troyer, EA  | Troyer, Emily A.; Koh   | Hong, Suzi(California)           |    |         |         |   | [Troyer, E] Hong, SZ (通訊作者)      | Co      |   |
| 7  | 400        | 2017   |    | Howes, O    | Howes, O    | Howes, Oliver D.; Mc    | Howes, Oliver D.(U.K)            |    |         |         |   | [Howes, C] Howes, OD (通訊作        |         |   |
| 8  | 396        | 2018   |    | Charlson, F | Charlson, F | Charlson, Fiona J.; Fe  | Charlson, Fiona J.(Australia)    |    |         |         |   | [Charlson, F] Charlson, FJ (通訊作  | me      |   |
| 9  | 357        | 2018   |    | Wang, Jin   | Wang, JY    | Wang, Jingyi; Mann, I   | Johnson, Sonia(U.K)              |    |         |         |   | [Wang, J] Johnson, S (通訊作者)      | Lor     |   |
| 10 | 357        | 2019   |    | Lai, Meng   | Lai, MC     | Lai, Meng-Chuan; Ka     | Lai, Meng-Chuan(Canada)          |    |         |         |   | [Lai, Meng] Lai, MC (通訊作者)       |         |   |
| 11 | 351        | 2017   |    | Freeman, D  | Freeman, D  | Freeman, D.; Reeve,     | Freeman, D.(U.K)                 |    |         |         |   | [Freeman, F] Freeman, D (通訊作     | As      |   |
| 12 | 349        | 2017   |    | Vancamp     | Vancamp     | Vancampfort, Davy;      | Vancampfort, Davy(Belgium)       |    |         |         |   | [Vancamp] Vancampfort, D (通訊     | Phy     |   |
| 13 | 313        | 2017   |    | Tiihonen, J | Tiihonen, J | Tiihonen, Jari; Mittne  | Tiihonen, Jari(Sweden)           |    |         |         |   | [Tiihonen, J] Tiihonen, J (通訊作   |         |   |
| 14 | 308        | 2019   |    | Di Forti, M | Di Forti, M | Di Forti, Marta; Quattr | Di Forti, Marta(U.K)             |    |         |         |   | [Di Forti, M] Di Forti, M (通訊作   |         |   |
| 15 | 302        | 2018   |    | Correll, Ch | Correll, CU | Correll, Christoph U.   | Correll, Christoph U. (New York) |    |         |         |   | [Correll, C] Correll, CU (通訊作    |         |   |
| 16 | 301        | 2018   |    | Hiser, Jan  | Hiser, J    | K Hiser, Jaryd; Koenigs | Koenigs, Michael(Wisconsin)      |    |         |         |   | [Hiser, J] Koenigs, M (通訊作       | De      |   |
| 17 | 293        | 2017   |    | Liu, Nancy  | Liu, NH     | Di Liu, Nancy H.; Daumi | Liu, Nancy H.(Switzerland)       |    |         |         |   | [Liu, Nanc] Liu, NH (通訊作者)       | Ex      |   |
| 18 | 289        | 2018   |    | Hibar, D. F | Hibar, DP   | Hibar, D. P.; Westlye   | Andreassen, O. A.(Norway)        |    |         |         |   | [Hibar, D. ] Andreassen, OA (通   |         |   |
| 19 | 283        | 2018   |    | van Erp, T  | van Erp, T  | van Erp, Theo G. M.;    | van Erp, Theo G. M. (California) |    |         |         |   | [van Erp, T] van Erp, TGM (通訊作   | Co      |   |
| 20 | 274        | 2017   |    | Howes, O    | Howes, O    | Howes, Oliver D.; Mc    | Howes, Oliver D.(U.K)            |    |         |         |   | [Howes, C] Howes, OD (通訊作        | Do      |   |
| 21 | 270        | 2017   |    | Schuch, F   | Schuch, F   | Schuch, Felipe; Vanc    | Schuch, Felipe(Brazil)           |    |         |         |   | [Schuch, F] Schuch, F (通訊作       | Phy     |   |
| 22 | 269        | 2018   |    | McQuinn     | McQuinn     | McQuinn, Robert; De     | McQuinn, Robert(U.K)             |    |         |         |   | [McQuinn, R] McQuinn, R (通訊作     |         |   |

Downloaded to MS Excel with 20606 records

|    | A                        | B     | C   | D      | E       | F       | G        | H                      | I        | J        | K              |
|----|--------------------------|-------|-----|--------|---------|---------|----------|------------------------|----------|----------|----------------|
| 1  | d                        | :dddd | FP  | :dddd  | degrees | 45      | 13944    | 0.733215               | 0.615821 | Y        | d              |
| 2  | World Psychiatry         | 4869  | 48  | 101.44 |         | 2572.69 | 0.017452 | 3.89182                | 101.44   | 6885.81  | World Psychi   |
| 3  | Lancet Psychiatry        | 6459  | 114 | 56.66  |         | 839.1   | 0.785398 |                        |          |          | Journals       |
| 4  | Am. J. Psychiat.         | 5732  | 113 | 50.73  |         | 752.16  |          | 1 Compute j, h(region) |          |          |                |
| 5  | Psychother. Psychosom    | 343   | 7   | 49     |         | 711     | 257.83   |                        |          |          |                |
| 6  | JAMA Psychiatry          | 7974  | 198 | 40.27  |         | 699.84  | 1830.99  | 2 Compute j, h(unit)   |          |          |                |
| 7  | Biol. Psychiatry         | 7377  | 217 | 34     |         | 681.4   | 0.140815 |                        |          | 10432.65 | Biol. Psychiat |
| 8  | Depress. Anxiety         | 334   | 10  | 33.4   |         | 612.27  |          |                        |          |          |                |
| 9  | Prog. Molec. Biol. Trans | 56    | 2   | 28     |         | 568.7   | 30       | 3 Dept                 |          |          | unit->region   |
| 10 | Mol. Psychiatr.          | 10112 | 430 | 23.52  |         | 567.64  | 0.433542 |                        |          |          |                |
| 11 | J. Neurol. Neurosurg. P  | 163   | 7   | 23.29  |         | 563.49  |          |                        |          | 230.52   | J. Neurol. Nei |
| 12 | Br. J. Psychiatry        | 2402  | 122 | 19.69  |         | 552.12  | 1305     | 4 Compute j, h(auth)   |          |          |                |
| 13 | Brain Behav. Immun.      | 2591  | 132 | 19.63  |         | 544.48  |          |                        |          |          |                |
| 14 | Schizophr. Bull.         | 13944 | 745 | 18.72  |         | 541.96  |          | 6.614726               | 18.72    | 1971     | Univ :nouniv   |
| 15 | Psychosom. Med.          | 185   | 10  | 18.5   |         | 513.67  |          |                        |          |          |                |
| 16 | Addiction                | 310   | 17  | 18.24  |         | 512.56  |          | 1.2 sorting A-E        |          | 438.41   | Addiction      |
| 17 | J. Am. Acad. Child Ado   | 739   | 43  | 17.19  |         | 511.04  |          | 3.78419                | 17.19    | 1045.1   | J. Am. Acad.   |
| 18 | Neuropsychopharmac       | 4001  | 240 | 16.67  |         | 505.56  |          | 5.484797               | 16.67    | 5658.27  | Neuropsych     |
| 19 | Behav. Sleep Med.        | 50    | 3   | 16.67  |         | 498.22  |          |                        |          | 70.71    | Behav. Sleep   |
| 20 | Curr. Psychiatry Rep.    | 840   | 53  | 15.85  |         | 491.77  |          |                        |          | 1187.94  | Curr. Psychi   |
| 21 | Res. Autism Spectr. Dis  | 139   | 9   | 15.44  |         | 457.15  |          |                        |          | 196.58   | Res. Autism    |
| 22 | Acta Psychiatr. Scand.   | 2691  | 178 | 15.12  |         | 447.48  |          |                        |          | 3805.65  | Acta Psychia   |
| 23 | Psychol. Med.            | 8396  | 574 | 14.63  |         | 426.04  |          | Degrees(atan(B/C       |          | 11873.74 | Psychol. Med   |
| 24 | Transl. Psychiatr.       | 7991  | 560 | 14.27  |         | 424.71  |          |                        |          | 11300.98 | Transl. Psych  |
| 25 | Drug Alcohol Depend.     | 380   | 27  | 14.07  |         | 416.2   |          | 3.332205               | 14.07    | 537.4    | Drug Alcohol   |

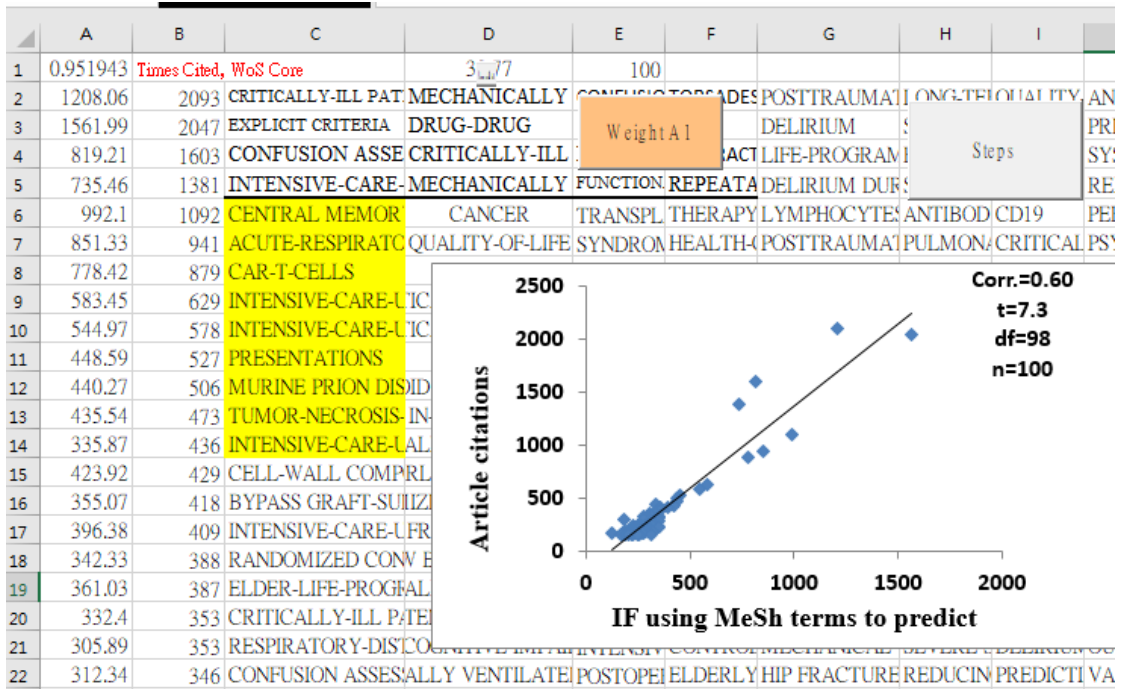

Predict article citations using the keyword IF

|  | F            | G       | H    | I       | J    | K        | L | M | N |
|--|--------------|---------|------|---------|------|----------|---|---|---|
|  | Barr Juliana | 1208.06 | 2093 | 1208.06 | 2093 | DELIRIUM | 1 | 1 |   |
|  | Radcliff Sue | 1561.99 | 2047 | 1561.99 | 2047 | DELIRIUM | 1 | 1 |   |
|  | Inouye Sha   | 819.21  | 1603 | 819.21  | 1603 | DELIRIUM | 1 | 1 |   |
|  | Pandharipa   | 735.46  | 1381 | 735.46  | 1381 | DELIRIUM | 1 | 1 |   |
|  | Kochender    | 992.1   | 1092 | 992.1   | 1092 | DELIRIUM | 1 | 1 |   |
|  | Rogers Jon   | 851.33  | 941  | 851.33  | 941  | DELIRIUM | 1 | 1 |   |
|  | Lee Daniel   | 778.42  | 879  | 778.42  | 879  | DELIRIUM | 1 | 1 |   |
|  | Devlin Johr  | 583.45  | 629  | 583.45  | 629  | DELIRIUM | 1 | 1 |   |
|  | Devlin Johr  | 544.97  | 578  | 544.97  | 578  | DELIRIUM | 1 | 1 |   |
|  | Paterson Ro  | 448.59  | 527  | 448.59  | 527  | BRAIN    | 2 | 2 |   |
|  | Cunningha    | 440.27  | 506  | 440.27  | 506  | BRAIN    | 2 | 2 |   |
|  | Varatharaj   | 435.54  | 473  | 435.54  | 473  | DELIRIUM | 1 | 1 |   |
|  | Salluh Jorge | 335.87  | 436  | 335.87  | 436  | DELIRIUM | 1 | 1 |   |
|  | Hoogland In  | 423.92  | 429  | 423.92  | 429  | DELIRIUM | 1 | 1 |   |
|  | Meybohm F    | 355.07  | 418  | 355.07  | 418  | DELIRIUM | 1 | 1 |   |
|  | Aldecoa Ce   | 396.38  | 409  | 396.38  | 409  | DELIRIUM | 1 | 1 |   |

## Organizing data in MS Excel

responses (rows for person and columns for items)

```

WOS:000401692000017 885 885 503.25 503.25 0.6
WOS:000459483600022 834 834 834 834 0.6
WOS:000584109900033 522 522 395.98 395.98 0.5
WOS:000397324300024 437 437 316.79 316.79 0.4
WOS:000542985400014 426 426 375.15 375.15 0.4
WOS:000398864700008 400 400 339.97 339.97 0.4
WOS:000458891800008 398 398 322.62 322.62 0.4
WOS:000433388700004 357 357 325 325 0.4
WOS:000488278000027 357 357 275.31 275.31 0.4
WOS:000410843500001 351 351 304.28 304.28 0.4
WOS:000411728300021349 349 303.46 303.46 0.4
WOS:000404989700008 313 313 280.28 280.28 0.3
WOS:000465018900027 308 308 282.42 282.42 0.3
WOS:000434408700005 302 302 287.87 287.87 0.3
WOS:000427777900005 301 301 278.9 278.9 0.3
WOS:000393983000009 293 293 271.22 271.22 0.3

```

For the format from differnce sources, see below examples...

```

6 ci=885 wi=503.25
6 ci=834 wi=834
5 ci=522 wi=395.98
4 ci=437 wi=316.79
4 ci=426 wi=375.15
4 ci=400 wi=339.97
4 ci=398 wi=322.62
4 ci=357 wi=325
4 ci=357 wi=275.31
4 ci=351 wi=304.28
4 ci=349 wi=303.46
4 ci=313 wi=280.28
4 ci=308 wi=282.42
4 ci=302 wi=287.87
4 ci=301 wi=278.9
4 ci=293 wi=271.22

```

Copy from MS Excel and Paste them onto the boxes: one for data, another for sample size, respectively. Click on the submit bottom, the Forst plot is

Forest Source: [95%CI\_SD]    
 Examples for use in Forest plot  
 SE adjustment(95CIline) [1]  
 se link setting(1 to 10) [0]  
 Forest bubble for type(0 for estimate, 1 for SE: [0] Wider on X: [1] Wider on Y: [1]  
 add X: [0] add Y: [0] add l-line: [0] To left x<0 more: [1] Bubblesize: [1] 啟 移

Article citations(y)

Barr, Juliana(U.S) 2013  
citations=2093

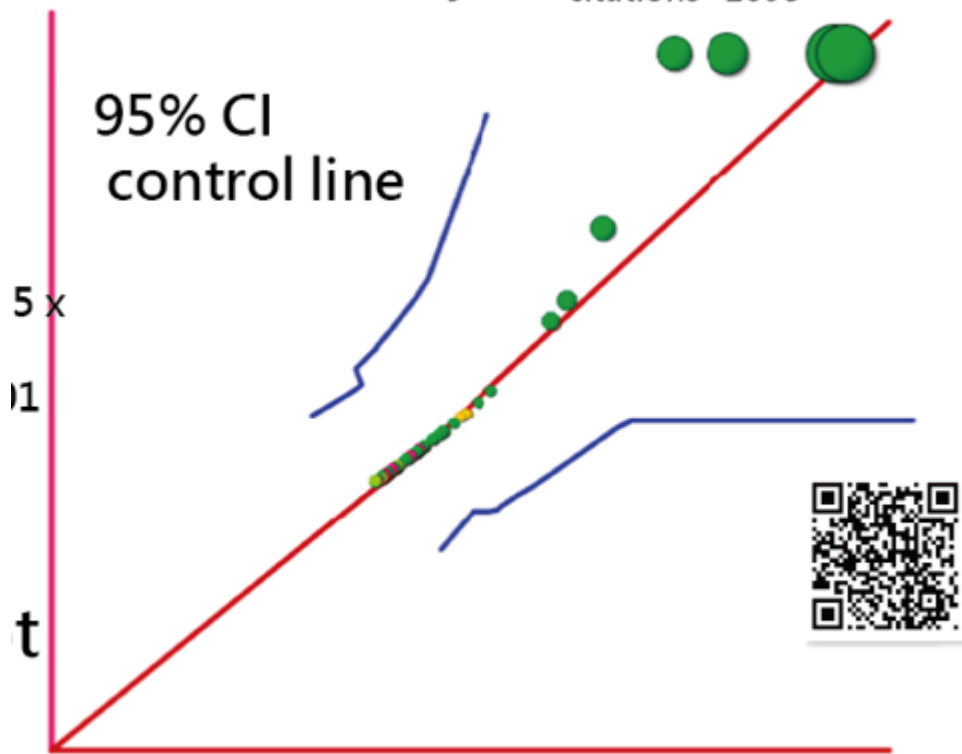

Article citations based on keyword(x)

|                 | U        | V        | W        | X        | Y        | Z | AA | AB                                            | AC | AD | AE |
|-----------------|----------|----------|----------|----------|----------|---|----|-----------------------------------------------|----|----|----|
| 1               |          |          |          |          |          |   |    |                                               |    |    |    |
| U.S             | 0.712145 | 0.712145 | 0.692064 | 0.692064 | 18861.23 |   | 1  | RP=4155 FP=4096 k=0.99 theta=45.41 CJA=1886   |    |    |    |
| China           | 0.285334 | 0.285334 | 0.299968 | 0.299968 | 9248.93  |   | 1  | RP=1698 FP=1741 k=0.41 theta=44.28 CJA=9248   |    |    |    |
| Copy 1          | 0.266356 | 0.266356 | 0.314985 | 0.314985 | 8037.53  |   | 1  | RP=1635 FP=1778 k=0.41 theta=42.6 CJA=8037.53 |    |    |    |
|                 | 0.207913 | 0.207913 | 0.163744 | 0.163744 | 5096.68  |   | 1  | RP=1155 FP=1025 k=0.26 theta=48.41 CJA=5096   |    |    |    |
|                 | 0.171802 | 0.171802 | 0.167378 | 0.167378 | 4781.06  |   | 1  | RP=1003 FP=990 k=0.24 theta=45.37 CJA=4781.06 |    |    |    |
|                 | 0.174281 | 0.174281 | 0.165432 | 0.165432 | 4609.78  |   | 1  | RP=1011 FP=985 k=0.24 theta=45.75 CJA=4609.78 |    |    |    |
| Copy 2          | 0.130445 | 0.130445 | 0.132147 | 0.132147 | 3890.98  |   | 1  | RP=769 FP=774 k=0.19 theta=44.81 CJA=3890.98  |    |    |    |
|                 | 0.122786 | 0.122786 | 0.123127 | 0.131812 | 3660.96  |   | 1  | RP=722 FP=723 k=0.18 theta=44.96 CJA=3660.96  |    |    |    |
|                 | 0.126707 | 0.126707 | 0.131812 | 0.100493 | 3179.7   |   | 1  | RP=752 FP=767 k=0.14 theta=44.43 CJA=3179.7   |    |    |    |
|                 | 0.101514 | 0.101514 | 0.100493 | 0.107897 | 3061.52  |   | 1  | RP=595 FP=592 k=0.15 theta=45.14 CJA=3061.52  |    |    |    |
| Kings Coll Lond | 0.620289 | 0.620289 | -0.73685 | 0.172427 | 2572.69  |   | 2  | RP=456 FP=497 k=0.96 theta=42.54 CJA=2572.69  |    |    |    |
| Shanghai Jiao T | 0.245475 | 0.245475 | -0.26539 | 0.120812 | 839.1    |   | 2  | RP=176 FP=183 k=0.36 theta=43.88 CJA=839.1    |    |    |    |
| Univ Pittsburgh | 0.161511 | 0.161511 | -0.22391 | 0.113013 | 752.16   |   | 2  | RP=124 FP=146 k=0.28 theta=40.34 CJA=752.16   |    |    |    |
| Ctr Addict & Me | 0.212759 | 0.212759 | -0.19285 | 0.142172 | 711      |   | 2  | RP=146 FP=139 k=0.29 theta=46.41 CJA=711      |    |    |    |
| Peking Univ(Chi | 0.184248 | 0.184248 | -0.18709 | 0.132384 | 699.84   |   | 2  | RP=130 FP=131 k=0.26 theta=44.78 CJA=699.84   |    |    |    |
| Karolinska Inst | 0.149396 | 0.149396 | -0.15509 | 0.16957  | 681.4    |   | 2  | RP=106 FP=108 k=0.22 theta=44.46 CJA=681.4    |    |    |    |
| UCL(U.K)        | 0.156062 | 0.156062 | -0.193   | 0.164518 | 612.27   |   | 2  | RP=116 FP=129 k=0.25 theta=41.96 CJA=612.27   |    |    |    |
| Columbia Univ(U | 0.136847 | 0.136847 | -0.17094 | 0.165385 | 568.7    |   | 2  | RP=102 FP=114 k=0.22 theta=41.82 CJA=568.7    |    |    |    |
| Sichuan Univ(C  | 0.12954  | 0.12954  | -0.14661 | 0.145044 | 567.64   |   | 2  | RP=94 FP=100 k=0.2 theta=43.23 CJA=567.64     |    |    |    |
| Cent South Univ | 0.14158  | 0.14158  | -0.13304 | 0.143309 | 563.49   |   | 2  | RP=98 FP=95 k=0.19 theta=45.89 CJA=563.49     |    |    |    |
| Psychiat        | -0.63358 | 0.633578 | -0.73219 | 0.140753 | 14603.71 |   | 3  | RP=3253 FP=3497 k=0.97 theta=42.93 CJA=1460   |    |    |    |
| Psychol         | -0.16245 | 0.162454 | -0.18347 | 0.15615  | 3555.26  |   | 3  | RP=829 FP=881 k=0.25 theta=43.26 CJA=3555.26  |    |    |    |
| Psychiat & Dev  | 0.07428  | 0.074270 | 0.07233  | 0.151003 | 1894.34  |   | 3  | RP=355 FP=360 k=0.1 theta=44.6 CJA=1894.34    |    |    |    |

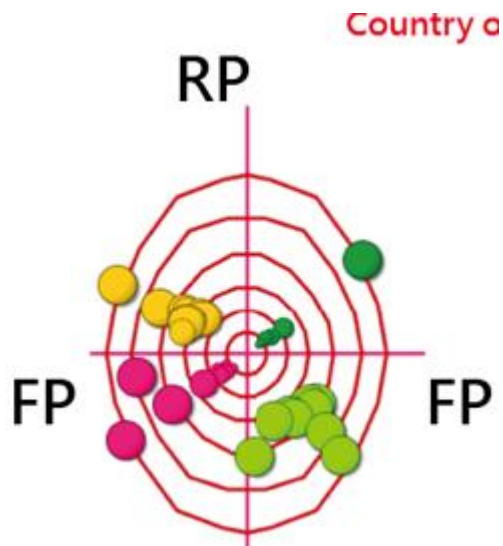

|                         | C                       | D                 | E                 | F                  | G               | H      |
|-------------------------|-------------------------|-------------------|-------------------|--------------------|-----------------|--------|
|                         |                         |                   |                   |                    | Space no use    |        |
| CRITICALLY-ILL PATIENTS | MECHANICALLY            | CONFUSION         | TORSADES          | POSTTRAUMATIC      | LONG-TERM       |        |
| EXPLICIT CRITERIA       | DRUG-DRUG               | DEMENTIA          | RISK              | DELIRIUM           | SLEEP           |        |
| CONFUSION ASSESSMENT    | CRITICALLY-ILL PATIENTS | POSTOPERATIVE     | HIP-FRACTURE      | LIFE-PROGRAM       | FUNCTIONAL      |        |
| INTENSIVE-CARE-UNIT     | MECHANICALLY            | FUNCTIONAL        | REPEATED          | DELIRIUM DURATION  | SURVIVAL        |        |
| CENTRAL MEMORY          | CANCER                  | TRANSPLANTATION   | THERAPY           | LYMPHOCYTES        | ANTIBIOTICS     |        |
| ACUTE-RESPIRATORY       | QUALITY-OF-LIFE         | SYNDROME          | HEALTH-RELATED    | POSTTRAUMATIC      | PULMONARY       |        |
| CAR-T-CELLS             | B-CELL                  | CORNELL           | THERAPY           | BLINATUMOMAB       | NEUROTOXICITY   |        |
| INTENSIVE-CARE-UNIT     | CRITICALLY-ILL PATIENTS | MECHANICALLY      | CONFUSION         | QUALITY-OF-LIFE    | POSTTRAUMATIC   |        |
| INTENSIVE-CARE-UNIT     | CRITICALLY-ILL PATIENTS | MECHANICALLY      | ANALGESICS        | LONG-TERM SURVIVAL | RESPIRATORY     |        |
| PRESENTATIONS           | BRAIN                   | COVID-19          | SARS-CoV-2        | encephalitis       | ADEM            |        |
| MURINE PRION DISEASE    | DIPEPTIDYL AMINO ACID   | PRECURSOR PEPTIDE | TRANSGENIC        | LONG-TERM          | CENTRAL-NERVOUS | SYSTEM |
| TUMOR-NECROSIS-FACTOR   | IN-VITRO MODEL          | CENTRAL           | EXPERIMENTAL      | LIPOPOLYSACCHARIDE | EXPERIMENTAL    |        |
| INTENSIVE-CARE-UNIT     | ALLY VENTILATED         | CONFUSION         | RANDOM            | TERM COGNITIVE     | IN-HOSPITAL     |        |
| CELL-WALL COMPONENTS    | EARLY-LIFE INFECTIONS   | MEMORY            | GLIAL ACQUISITION | ADJUNCTIVE         | MOUSE MODEL     |        |
| BYPASS GRAFT-SUMMARY    | CONTROLLED              | ACUTE KIDNEY      | CARDIAC           | MYOCARDIAL         | DOUBLE          |        |

SNA

|    | A                 | B                      | C          |
|----|-------------------|------------------------|------------|
| 1  |                   |                        |            |
| 2  | CRITICALLY-ILL PA | MECHANICALLY V         | 1.29525    |
| 3  | OXIMETRY          | deliberate hypotensic  | 1448.90245 |
| 4  | CRITICALLY-ILL PA | TORSADES-DE-POI        | 0.00956    |
| 5  | CRITICALLY-ILL PA | POSTTRAUMATIC-         | 0.18029    |
| 6  | CRITICALLY-ILL PA | LONG-TERM SEDA         | 0.07279    |
| 7  | CRITICALLY-ILL PA | QUALITY-OF-LIFE        | 0.16103    |
| 8  | CRITICALLY-ILL PA | ANALGESIA-BASE         | 0.03340    |
| 9  | CRITICALLY-ILL PA | CHEST TUBE REMO        | 0.00216    |
| 10 | CRITICALLY-ILL PA | NONSTEROIDAL A         | 0.00480    |
| 11 | CRITICALLY-ILL PA | agitation              | 0.04172    |
| 12 | CRITICALLY-ILL PA | analgesia              | 0.06074    |
| 13 | CRITICALLY-ILL PA | critical care medicine | 0.00543    |
| 14 | CRITICALLY-ILL PA | delirium               | 0.82640    |
| 15 | CRITICALLY-ILL PA | evidence-based medi    | 0.00960    |
| 16 | CRITICALLY-ILL PA | GRADE                  | 0.01605    |
| 17 | CRITICALLY-ILL PA | guidelines             | 0.00911    |
| 18 | CRITICALLY-ILL PA | intensive care         | 0.12588    |
| 19 | CRITICALLY-ILL PA | outcomes               | 0.03153    |

|    | A                          | B | C |
|----|----------------------------|---|---|
| 1  | *Vertices 7552             |   |   |
| 2  | 1 "PSYCHIATRIC-DISORDERS"  |   |   |
| 3  | 2 "RISK"                   |   |   |
| 4  | 3 "SCHIZOPHRENIA"          |   |   |
| 5  | 4 "BLOOD"                  |   |   |
| 6  | 5 "BIPOLAR DISORDER"       |   |   |
| 7  | 6 "DISORDERS"              |   |   |
| 8  | 7 "PHARMACOLOGY"           |   |   |
| 9  | 8 "MECHANISMS"             |   |   |
| 10 | 9 "PSYCHOSIS"              |   |   |
| 11 | 10 "SYMPTOMS"              |   |   |
| 12 | 11 "ANXIETY"               |   |   |
| 13 | 12 "SARS"                  |   |   |
| 14 | 13 "BRAIN"                 |   |   |
| 15 | 14 "1ST-EPISODE PSYCHOSIS" |   |   |
| 16 | 15 "QUALITY-OF-LIFE"       |   |   |
| 17 | 16 "UNIPOLAR DEPRESSION"   |   |   |
| 18 | 17 "DEPRESSIVE SYMPTOMS"   |   |   |
| 19 | 18 "MENTAL-DISORDERS"      |   |   |

Codes for Pajek



Pajek64

File Network Networks Operations Partition Partitions Vector Vectors Permutation Permutations Cluster Hierarchy Options Draw Macro Info Tools

**Networks**  
 1. F:\submissionTO\2208scheke\pajek.txt (7552)

**Partitions**  
 1. Louvain Communities in N1 (7552, Res=0.500000, Q=0.649255, M)

**Vectors**  
 1. Weighted All Degree of N1 (7552)

**Permutations**

Report

File

Saving network to file --- F:\submissionTO\2208scheke\al.net

Time spent: 0:00:00

### A. Keyword cluster

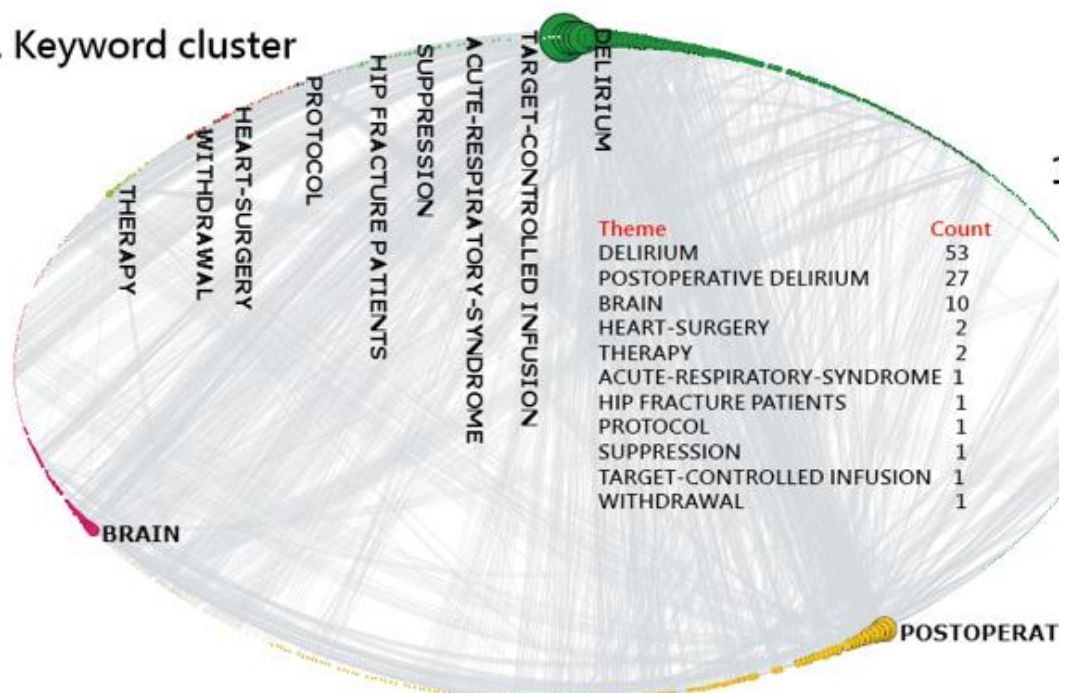

|    | A         | B    | C         | D      | E      | F   | G         | H               | I |
|----|-----------|------|-----------|--------|--------|-----|-----------|-----------------|---|
| 1  | *Vertices | 7552 |           | 7552   |        |     | *Vertices |                 |   |
| 2  |           | 1    | PSYCHIA   | 0.4874 | 0.4499 | 0.5 |           |                 |   |
| 3  |           | 2    | RISK      | 0.409  | 0.5066 | 0.5 |           | Copy coordinate |   |
| 4  |           | 3    | SCHIZOPH  | 0.1975 | 0.8072 | 0.5 |           |                 |   |
| 5  |           | 4    | BLOOD     | 0.205  | 0.6701 | 0.5 |           |                 |   |
| 6  |           | 5    | BIPOLAR   | 0.0896 | 0.5501 | 0.5 |           |                 |   |
| 7  |           | 6    | DISORDE   | 0.2717 | 0.4934 | 0.5 |           | Copy entities   |   |
| 8  |           | 7    | PHARMAC   | 0.2051 | 0.6676 | 0.5 |           |                 |   |
| 9  |           | 8    | MECHAN    | 0.2051 | 0.6667 | 0.5 |           |                 |   |
| 10 |           | 9    | PSYCHOS   | 0.3221 | 0.8677 | 0.5 |           | Clear all       |   |
| 11 |           | 10   | SYMPTOM   | 0.2052 | 0.665  | 0.5 |           |                 |   |
| 12 |           | 11   | ANXIETY   | 0.2053 | 0.6642 | 0.5 |           |                 |   |
| 13 |           | 12   | SARS      | 0.2054 | 0.6633 | 0.5 |           |                 |   |
| 14 |           | 13   | BRAIN     | 0.7661 | 0.1626 | 0.5 |           |                 |   |
| 15 |           | 14   | 1ST-EPISC | 0.1779 | 0.2987 | 0.5 |           | number +' in C  |   |
| 16 |           | 15   | QUALITY   | 0.2054 | 0.6625 | 0.5 |           |                 |   |
| 17 |           | 16   | UNIPOLA   | 0.2055 | 0.6616 | 0.5 |           |                 |   |
| 18 |           | 17   | DEPRESSI  | 0.2056 | 0.6608 | 0.5 |           |                 |   |
| 19 |           | 18   | MENTAL-   | 0.3866 | 0.1682 | 0.5 |           | relations       |   |
| 20 |           | 19   | PATTERN   | 0.4619 | 0.1415 | 0.5 |           |                 |   |

Results from SNA and transform data into data below

|    | A                        | B      | C       | D        | E    |
|----|--------------------------|--------|---------|----------|------|
| 1  |                          | #REF!  | #REF!   | 21881.85 | 0.68 |
| 2  | SCHIZOPHRENIA            | -30.72 | -54.45  | 956.1718 | 0.62 |
| 3  | BIPOLAR DISORDER         | -5.01  | -73.872 | 392.4725 | 0.54 |
| 4  | RISK                     | -0.66  | -16.38  | 339.9538 | 0.53 |
| 5  | METAANALYSIS             | 14.84  | -21.42  | 306.055  | 0.52 |
| 6  | PSYCHOSIS                | -36.77 | -32.022 | 236.1895 | 0.50 |
| 7  | RISK-FACTORS             | -15.91 | -52.938 | 226.7092 | 0.49 |
| 8  | ASSOCIATION              | -15.32 | -52.758 | 208.2116 | 0.49 |
| 9  | SYMPTOMS                 | -16.5  | -53.064 | 206.1575 | 0.48 |
| 10 | 1ST-EPISODE PSYCHOSIS    | 20.13  | -57.978 | 180.7478 | 0.47 |
| 11 | MAJOR DEPRESSIVE DISORDI | -13.32 | -51.444 | 144.7719 | 0.45 |
| 12 | FOLLOW-UP                | -13.17 | -51.3   | 143.2608 | 0.45 |
| 13 | MORTALITY                | -14.18 | -52.128 | 141.502  | 0.45 |

In excel



|    | A                                                                                | B | C | D | E | F | G          | H |
|----|----------------------------------------------------------------------------------|---|---|---|---|---|------------|---|
| 1  | <!--<br>#include<br>file="./A<br>DOFunc<br>ons.asp" --<br>>                      |   |   |   |   |   | google map |   |
| 2  | <!DOCTYPE html PUBLIC "-//W3C//DTD XHTML 1.0 Strict//EN" "http://www.w3.org/TR/x |   |   |   |   |   |            |   |
| 3  | <html>                                                                           |   |   |   |   |   |            |   |
| 4  | <html xmlns="http://www.w3.org/1999/xhtml">                                      |   |   |   |   |   |            |   |
| 5  | <head>                                                                           |   |   |   |   |   |            |   |
| 6  | <meta http-equiv="Content-Type" content="text/html; charset=big5" />             |   |   |   |   |   |            |   |
| 7  | <meta http-equiv="Content-Type" content="text/html; charset=utf-8" />            |   |   |   |   |   |            |   |
| 8  | <title>PaperABC_GoogleMap</title>                                                |   |   |   |   |   |            |   |
| 9  | <meta name="viewport" content="width=device-width; initial-scale=1.0">           |   |   |   |   |   |            |   |
| 10 |                                                                                  |   |   |   |   |   |            |   |
| 11 | ...</script>                                                                     |   |   |   |   |   |            |   |

Got the HTML

|    | A                  | B      | C       | D         | E                      | F          | G       | H         | I              |
|----|--------------------|--------|---------|-----------|------------------------|------------|---------|-----------|----------------|
| 1  | Times Cited, WoS C | Volume | country | institute | Publicatio             | Documen    | dept    | PT        |                |
| 2  | 685                |        | 2017    | U.S       | Northwell Hlth(U.S)    | World Psy  | Article |           | Correll, Chris |
| 3  | 634                |        | 2019    | China     | Peking Univ(China)     | Lancet Ps  | Article | Natl Clin | Huang, Yuec    |
| 4  | 522                |        | 2020    | Spain     | Univ Complutense(Spa   | Lancet Ps  | Article | Child & a | Moreno, Can    |
| 5  | 437                |        | 2017    | Denmark   | Copenhagen Univ Hosp   | Lancet Ps  | Article | Mental H  | Hjorthoj, Car  |
| 6  | 426                |        | 2020    | U.S       | Univ Calif San Diego(U | Brain Beh  | Review  | Psychiat  | Troyer, Emil   |
| 7  | 400                |        | 2017    | U.K       | Kings Coll London(U.K  | Am. J. Ps  | Review  | Clin Sci  | Howes, Olive   |
| 8  | 396                |        | 2018    | Australia | Univ Queensland(Austr  | Schizophr  | Article |           | Charlson, Fic  |
| 9  | 357                |        | 2018    | U.K       | UCL(U.K)               | BMC Psyc   | Review  | Psychiat  | Wang, Jingyi   |
| 10 | 357                |        | 2019    | Canada    | Margaret & Wallace Mc  | Lancet Ps  | Review  | Margaret  | Lai, Meng-Cl   |
| 11 | 351                |        | 2017    | U.K       | Univ Oxford(U.K)       | Psychol. J | Review  | Psychiat  | Freeman, D.(   |
| 12 | 349                |        | 2017    | Belgium   | Univ Leuven(Belgium)   | World Psy  | Review  | Rehabil S | Vancampfort    |
| 13 | 313                |        | 2017    | Sweden    | Karolinska Inst(Sweder | JAMA Ps    | Article | Clin Neu  | Tiihonen, Jar  |
| 14 | 308                |        | 2019    | U.K       | Kings Coll London(U.K  | Lancet Ps  | Article | Social Ge | Di Forti, Mar  |
| 15 | 302                |        | 2018    | U.S       | Northwell Hlth(U.S)    | JAMA Ps    | Review  | Psychiat  | Correll, Chris |
| 16 | 301                |        | 2018    | U.S       | Univ Wisconsin(U.S)    | Biol. Psyc | Review  | Psychiat  | Hiser, Jaryd(  |
| 17 | 293                |        | 2017    | Switzerla | World Hlth Org(Switze  | World Psy  | Article |           | Liu, Nancy F   |

To draw the Alluvial plot

|    | A  | B           | C    | D           | E  | F    | G          | H           | I   |
|----|----|-------------|------|-------------|----|------|------------|-------------|-----|
| 1  |    |             |      |             | 0  |      |            |             |     |
| 2  | C1 | 2018        | 3850 | Grover, Sar | 34 | 1361 | 2017       | U.S         | 670 |
| 3  | C1 | 2021        | 3747 | Correll, Ch | 33 | 260  | 2019       | China       | 272 |
| 4  | C1 | 2020        | 3732 | Fond, G.(F) | 23 | 242  | China      | Peking Uni  | 138 |
| 5  | C1 | 2019        | 3540 | Kendler, K  | 22 | 245  | 2020       | U.S         | 788 |
| 6  | C1 | 2017        | 3309 | Harvey, Ph  | 20 | 207  | Review     | Psychiat    | 408 |
| 7  | C2 | U.S         | 4096 | Zheng, We   |    | 89   | 2017       | U.K         | 296 |
| 8  | C2 | U.K         | 1778 | Fusar-Poli, |    | 57   | U.K        | Kings Coll  | 511 |
| 9  | C2 | China       | 1741 | Pelizza, Lo | 19 | 129  | 2018       | Australia   | 228 |
| 10 | C2 | Australia   | 1025 | Ohi, Kazut  | 10 | 118  | Schizophr. | Article     | 675 |
| 11 | C2 | Germany     | 990  | Strauss, Gr |    | 7    | 2018       | U.K         | 377 |
| 12 | C3 | Kings Coll  | 497  | Zhuo, Chua  |    | 6    | Psychol. M | Review      | 116 |
| 13 | C3 | Shanghai J. | 183  | Vancampfo   | 16 | 104  | 2019       | U.K         | 336 |
| 14 | C3 | Univ Pittsb | 146  | Moritz, Ste |    | 3    | 2018       | U.S         | 843 |
| 15 | C3 | Ctr Addict  | 139  | Fountoulak  |    | 7    | Psychiat   | Correll, Ch | 37  |
| 16 | C3 | Peking Uni  | 131  | Misiak, Bla | 15 | 85   | Review     | Psychosis & | 72  |
| 17 | C4 | Schizophr   | 1681 | Kishi, Tara | 15 | 81   | Article    | Psychosis & | 180 |

### Nodes and edges constructed

|    | A                  | B           | C      | D       | E       | F    | G       | H    | I |
|----|--------------------|-------------|--------|---------|---------|------|---------|------|---|
| 1  | Buffer             |             | 0      | 20      | #ff0066 | U.S  | Chi     | df   |   |
| 2  | 2017               | U.S         | 670    | #000000 | C1      | 0.51 | 270400  | 24   |   |
| 3  | 2019               | China       | 272    | #000000 | C1      | 0.52 | 81225   | 8    |   |
| 4  | China              | Peking Un   | 131    | #000000 | C2      | 0.48 | 115532  | 24   |   |
| 5  | 2020               | U.S         | 788    | #000000 | C1      | 0.46 | 61570.1 | 23   |   |
| 6  | Review             | Psychiat    | 404    | #000000 | C5      | 0.42 | 294     | 5    |   |
| 7  | 2017               | U.K         | 296    | #000000 | C1      |      |         |      |   |
| 8  | U.K                | Kings Coll  | 496    | #000000 | C2      | 0.51 | 0.52    | 0.48 |   |
| 9  | 2018               | Australia   | 210    | #000000 | C1      |      |         |      |   |
| 10 | Schizophr. Article |             | 625.47 | #000000 | C4      |      |         |      |   |
| 11 | 2018               | U.K         | 377    | #000000 | C1      |      |         |      |   |
| 12 | Psychol. M Review  |             | 102.59 | #000000 | C1      |      |         |      |   |
| 13 | 2019               | U.K         | 336    | #000000 | C1      |      |         |      |   |
| 14 | 2018               | U.S         | 843    | #ff0066 | C1      |      |         |      |   |
| 15 | Psychiat           | Correll, Ch | 32     | #ff0066 | C1      |      |         |      |   |
| 16 | Review             | Psychosis   | 62     | #000000 | C1      |      |         |      |   |
| 17 | Article            | Psychosis   | 155    | #000000 | C5      |      |         |      |   |
| 18 | Article            | Psychiat &  | 120    | #000000 | C5      |      |         |      |   |
| 19 | Article            | Psychiat    | 2965   | #ff0066 | C1      |      |         |      |   |
| 20 | 2018               | Germany     | 200    | #000000 | C1      |      |         |      |   |
| 21 | 2019               | U.S         | 720    | #000000 | C1      |      |         |      |   |

To generate Unknown edge

1 Unknow

1 Known flow

2 Check

Edge color

3 Goto DD2

Chisquare e

|    | A                                                | B | C | D | E                       |
|----|--------------------------------------------------|---|---|---|-------------------------|
| 1  | relation A                                       |   |   |   | https://sankeymatic.com |
| 2  | 2017 [670] U.S #000000                           |   |   |   |                         |
| 3  | 2019 [272] China #000000                         |   |   |   |                         |
| 4  | China [131] Peking Univ(China) #000000           |   |   |   |                         |
| 5  | 2020 [788] U.S #000000                           |   |   |   |                         |
| 6  | Review [404] Psychiat #000000                    |   |   |   |                         |
| 7  | 2017 [296] U.K #000000                           |   |   |   |                         |
| 8  | U.K [496] Kings Coll London(U.K) #000000         |   |   |   |                         |
| 9  | 2018 [210] Australia #000000                     |   |   |   |                         |
| 10 | Schizophr. Bull. [625.47] Article #000000        |   |   |   |                         |
| 11 | 2018 [377] U.K #000000                           |   |   |   |                         |
| 12 | Psychol. Med. [102.59] Review #000000            |   |   |   | Copy                    |
| 13 | 2019 [336] U.K #000000                           |   |   |   |                         |
| 14 | 2018 [843] U.S #ff0066                           |   |   |   |                         |
| 15 | Psychiat [32] Correll, Christoph U.(U.S) #ff0066 |   |   |   |                         |
| 16 | Review [62] Psychosis Studies #000000            |   |   |   |                         |
| 17 | ...                                              |   |   |   |                         |

To get codes for Alluvial plot

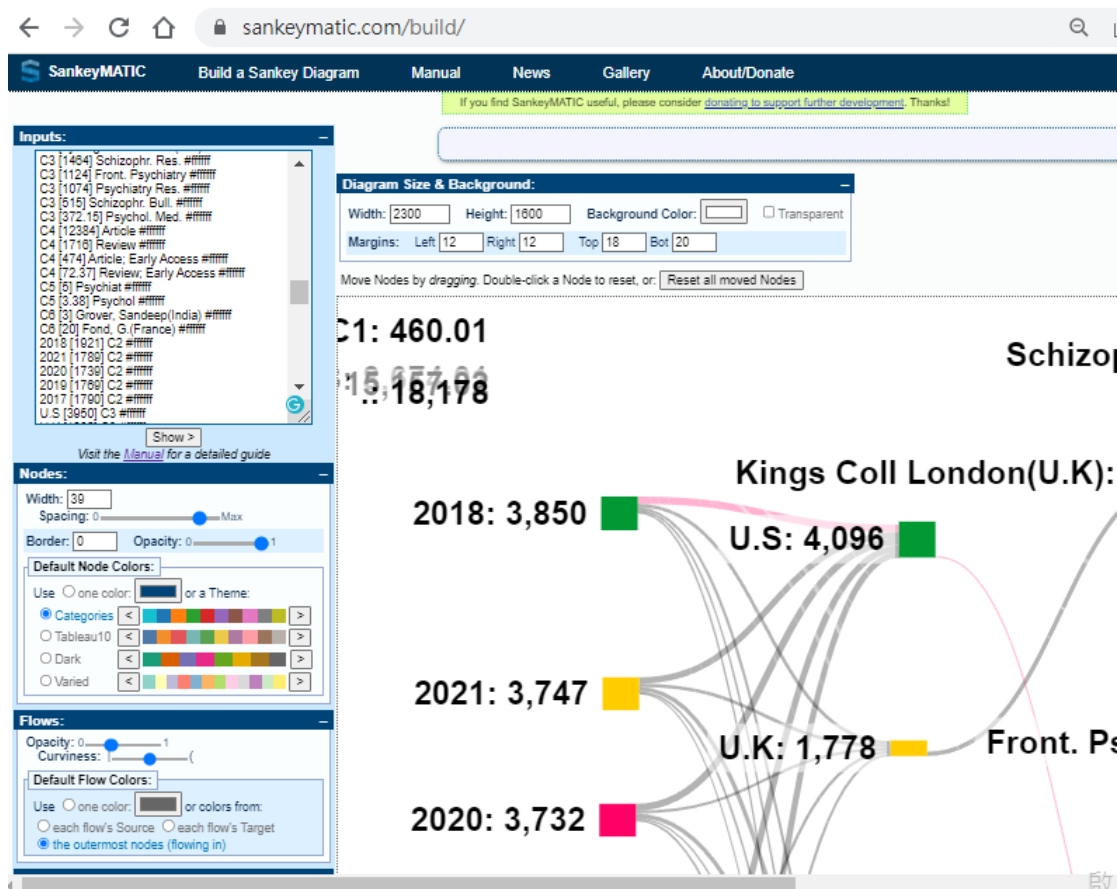

|    | A             | B         | C                       | D | E             | F     | G             |
|----|---------------|-----------|-------------------------|---|---------------|-------|---------------|
| 1  |               | *Vertices |                         |   | 序             | 關鍵字代表 | 作者代表          |
| 2  | U.S           | 1         | DELIRIUM                | 1 |               |       | U.S 76        |
| 3  | China         | 1         | COVID19 infection       | 2 |               |       | U.K 29        |
| 4  | Saudi Arabia  | 1         | dementia                | 2 |               |       | Australia 20  |
| 5  | Poland        | 1         | INTENSIVE-CARE-UNIT     | 1 |               |       | Netherland 12 |
| 6  | Brazil        | 1         | CRITICALLY-ILL PATIENTS | 1 |               |       | Canada 14     |
| 7  | U.K           | 2         | POSTOPERATIVE DELIRIUM  | 2 |               |       | Germany 10    |
| 8  | Italy         | 2         | RELIABILITY             | 1 |               |       | France 12     |
| 9  | Denmark       | 2         | CONFUSION ASSESSMENT ME | 1 |               |       | Ireland 12    |
| 10 | Belgium       | 2         | OLDER-ADULTS            | 2 |               |       | Spain 11      |
| 11 | North Ireland | 2         | older people            | 2 |               |       | South Korea   |
| 12 | Russia        | 2         | frailty                 | 2 |               |       | Japan         |
| 13 | Turkey        | 2         | MECHANICALLY VENTILATE  | 1 |               |       | Pakistan      |
| 14 | Australia     | 3         | MORTALITY               | 1 | 10&10table    |       | Country       |
| 15 | Malaysia      | 3         | BRAIN                   | 3 |               |       |               |
| 16 | New Zealand   | 3         | PREVALENCE              | 1 |               |       |               |
| 17 | Netherlands   | 4         | RISK                    | 1 | Top100Article |       | Country2      |
| 18 | Switzerland   | 4         | CARDIAC-SURGERY         | 1 |               |       |               |
| 19 | Canada        | 5         | ELDERLY-PATIENTS        | 2 |               |       |               |
| 20 | India         | 5         | COVID-19                | 3 |               |       |               |

To match with categories to each article

|    | A                      | B  | C  | D  | E  | F | G | H | I         |
|----|------------------------|----|----|----|----|---|---|---|-----------|
| 1  | 101                    | 1  | 2  | 3  | 4  | 5 | 6 | 7 | 8         |
| 2  | DELIRIUM               | 15 |    |    |    |   |   |   |           |
| 3  | DELIRIUM               | 10 |    |    |    |   |   |   |           |
| 4  | POSTOPERATIVE          | 3  | 6  | 1  |    |   |   |   |           |
| 5  | DELIRIUM               | 9  |    |    |    |   |   |   |           |
| 6  | THERAPY                | 1  |    |    | 9  |   |   |   | To R code |
| 7  | ACUTE-RESPIRAT         | 2  |    |    |    |   |   |   |           |
| 8  | THERAPY                | 2  |    |    | 10 |   |   |   |           |
| 9  | DELIRIUM               | 12 |    |    |    |   |   |   |           |
| 10 | DELIRIUM               | 12 |    |    |    |   |   |   |           |
| 11 | BRAIN                  |    |    | 4  |    |   |   |   |           |
| 12 | BRAIN                  | 2  | 1  | 10 |    |   |   |   |           |
| 13 | BRAIN                  | 1  |    | 12 |    |   |   |   |           |
| 14 | DELIRIUM               | 9  | 1  |    |    |   |   |   |           |
| 15 | BRAIN                  |    |    | 11 |    |   |   |   |           |
| 16 | DELIRIUM               | 7  |    | 1  | 1  |   |   |   |           |
| 17 | HIP FRACTURE P.        | 1  |    |    |    |   |   |   | 9         |
| 18 | DELIRIUM               | 12 |    |    |    |   |   |   |           |
| 19 | POSTOPERATIVE DELIRIUM |    | 10 |    |    |   |   |   |           |

Using the module to classify the category for each article



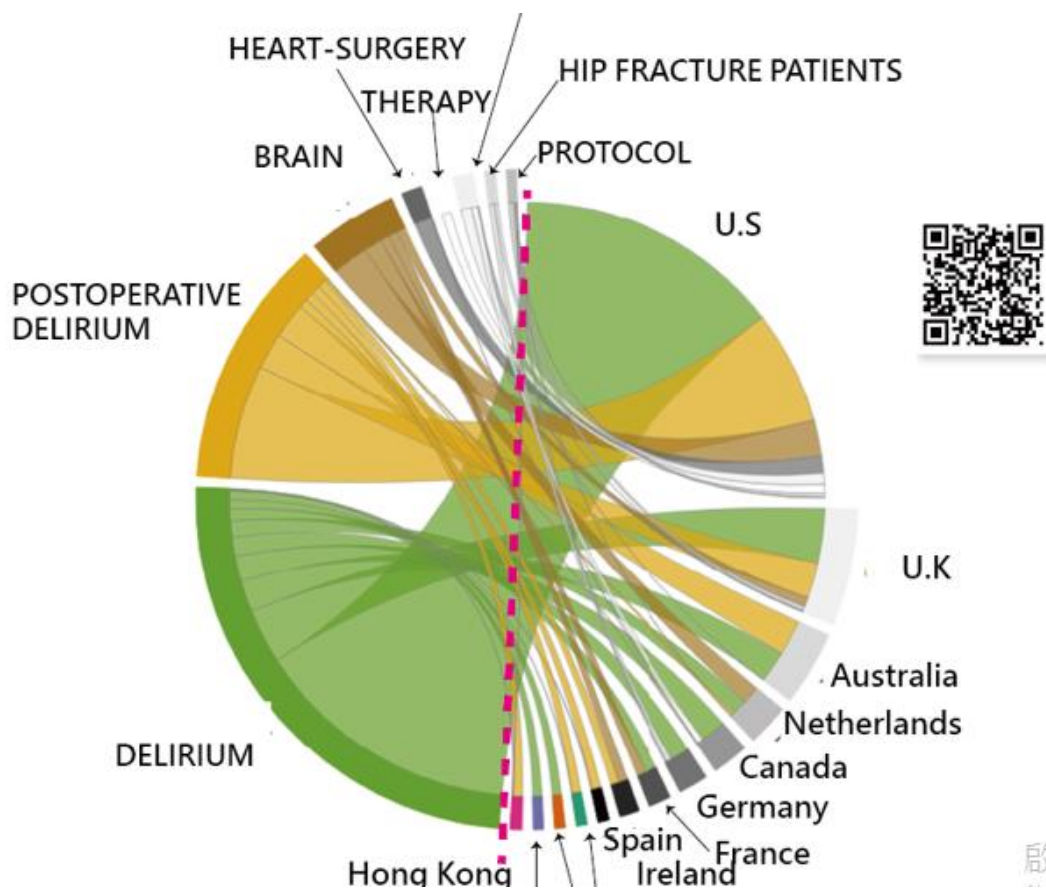

```

library(chorddiag)
students <- as.matrix(data.frame(DELIRIUM =
c(29.75,6.08,3.48,1.81,2.84,2.14,1.32,0,0.09,0.03,1,1,0.07),POSTOPERATIVE_DELIRIUM
= c(12.73,4.02,3.93,0.33,0.07,0,0,0.92,1,1,0,0,1),BRAIN =
c(4,1,0,2,0,0,1,1,0,0,0,0,0),HEART_SURGERY =
c(1.92,0.05,0,0,0.04,0,0,0,0,0,0,0,0),THERAPY =
c(1,0,0,0,0,0,0,0,0,0,0,0,0),ACUTE_RESPIRATORY_SYNDROME =
c(1.2,0.05,0.05,0,0.7,0,0,0,0,0,0,0,0),HIP_FRACTURE_PATIENTS =
c(0.43,0,0,0,0,0.57,0,0,0,0,0,0,0),PROTOCOL =
c(0.06,0.56,0,0.06,0,0.22,0,0,0,0,0,0,0.06)))
row.names(students) <- c("U.S", "U.K", "Australia", "Netherlands", "Canada",
"Germany", "France", "Ireland", "Spain", "South Korea", "Japan", "Pakistan", "Hong
Kong")
chorddiag(students, type = "bipartite", showTicks = FALSE, groupnameFontSize = 14,
groupnamePadding = 10, margin = 90)
ents, type = "bipartite", showTicks = FALSE, groupnameFontSize = 14,
groupnamePadding = 10, margin = 90)

```



Chien TW. 100 top-cited articles in this study. Online at

<http://www.healthup.org.tw/html100/delirium100.htm> (accessed Oct.4, 2022)

## A. 100 top-cited articles

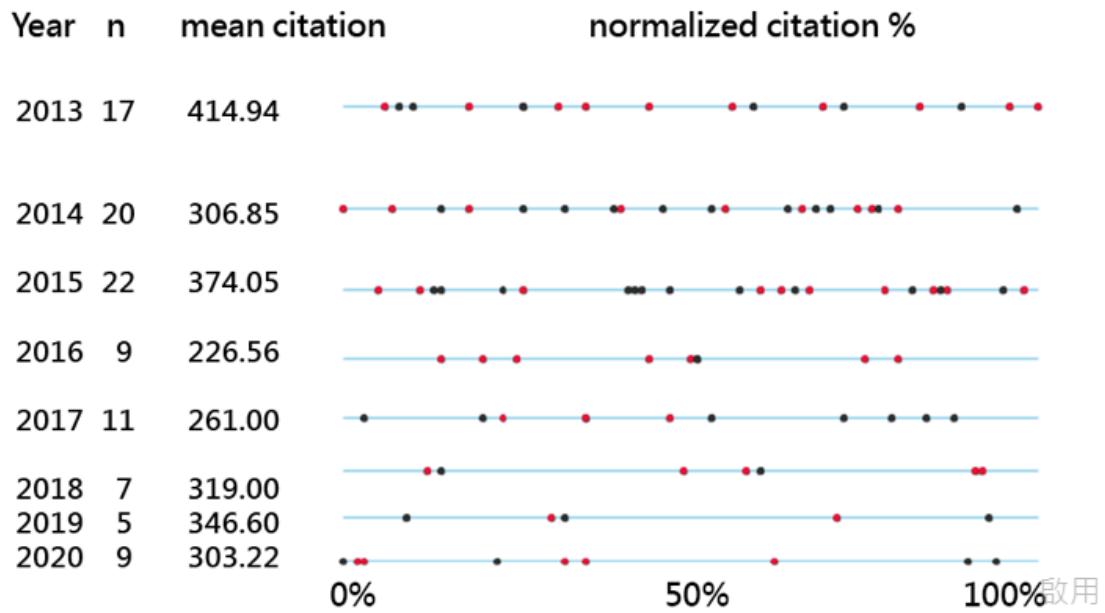

|      |    |       |      |      |       |
|------|----|-------|------|------|-------|
| 2002 | 17 | 38.02 | 0.89 | 1576 | 92.71 |
| 2003 | 11 | 19.81 | 0.58 | 805  | 73.18 |
| 2004 | 14 | 16.78 | 0.69 | 667  | 47.64 |
| 2005 | 18 | 34.84 | 0.83 | 1302 | 72.33 |
| 2006 | 19 | 23.05 | 0.8  | 842  | 44.32 |
| 2007 | 24 | 23.51 | 0.46 | 825  | 34.38 |
| 2008 | 19 | 40.89 | 0.71 | 1348 | 70.84 |
| 2009 | 20 | 25.7  | 0.78 | 854  | 42.7  |
| 2010 | 30 | 18.92 | 0.3  | 596  | 19.87 |
| 2011 | 25 | 40.4  | 0.91 | 1132 | 45.28 |
| 2012 | 22 | 67.83 | 0.83 | 1674 | 76.09 |
| 2013 | 25 | 43.49 | 1.32 | 1043 | 41.72 |
| 2014 | 22 | 39.44 | 0.58 | 929  | 42.09 |
| 2015 | 38 | 54.48 | 1.01 | 1089 | 30.25 |
| 2016 | 34 | 44.32 | 0.61 | 769  | 22.82 |
| 2017 | 27 | 102.6 | 0.57 | 1371 | 50.78 |

Ranked by Pubs by year in columns: Weighted RCR by Year, Median RCR by Year, Total Citations by Publication Year, and Citations per Pub by Year

|          |      |      |      |     |             |        |
|----------|------|------|------|-----|-------------|--------|
| 12028544 | 2002 | 0.47 | 25.3 | 20  | 0.638408847 | 9.236  |
| 12050325 | 2002 | 0.51 | 27.8 | 23  | 0.632332683 | 10.057 |
| 12161225 | 2002 | 1.46 | 64.0 | 55  | 0.085679623 | 2.778  |
| 12198440 | 2002 | 0.59 | 31.7 | 22  | 0.011579121 | 19.112 |
| 12422157 | 2002 | 0.88 | 45.7 | 36  | 0.086626296 | 4.749  |
| 12423725 | 2002 | 2.41 | 80.2 | 89  | 0.085558774 | 2.778  |
| 12481248 | 2002 | 0.44 | 23.5 | 17  | 0.011588259 | 11.105 |
| 12571196 | 2003 | 0.42 | 22.7 | 17  | 0.085558774 | 10.057 |
| 12765116 | 2003 | 0.38 | 20.3 | 14  | 0.011606491 | 5.36   |
| 12842235 | 2003 | 0.48 | 25.8 | 20  | 0.632149258 | 2.778  |
| 12918844 | 2003 | 0.19 | 9.3  | 8   | 0.00057849  | 0.5    |
| 12972115 | 2003 | 0.25 | 13.1 | 9   | 0.232544684 | 2.778  |
| 14530201 | 2003 | 1.67 | 69.1 | 175 | 0.085780795 | 29.89  |
| 14609590 | 2003 | 0.26 | 13.5 | 10  | 0.011656231 | 2.778  |
| 14678955 | 2003 | 1.08 | 53.2 | 41  | 7.801125-05 | 15.534 |
| 14697459 | 2004 | 0.38 | 19.3 | 15  | 0.232756404 | 2.778  |

PMID, Year, RCR, NIH Percentile, Total Citations, AWS, SCI\_JIF x-index on column

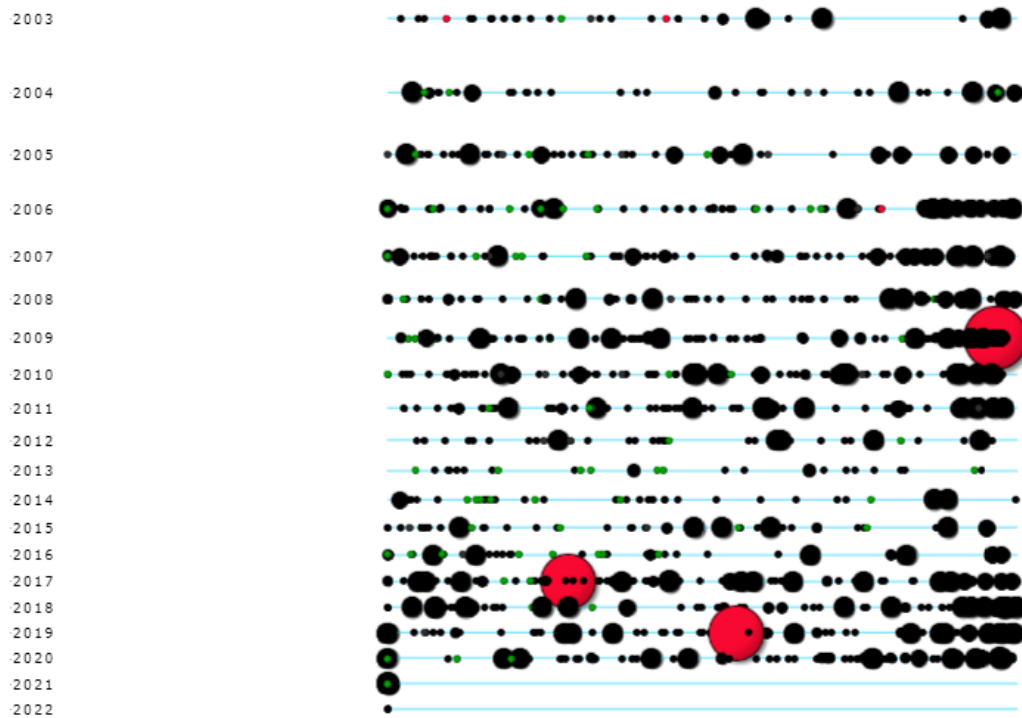

## Top 100

Web of Science 核心合輯中有 100 個結果：

---

限縮結果

- 高被引論文 71
- 熱門論文 2
- Review Article 30
- 開放取用 82
- 被引參考文獻深度分析 2

---

0/100

排序依據: 引用次數: 最高優先 < 1 / 2 >

1  American Geriatrics Society 2015 Updated Beers Criteria for Potentially Inappropriate Medication Use in Older Adults 2,183 引用日期

[Radcliff, S; Yue, JR; \(-\); Beers, MH](#) 42 參考文獻

Nov 2015 | JOURNAL OF THE AMERICAN GERIATRICS SOCIETY 63 (11), pp.2227-2246

The 2015 American Geriatrics Society (AGS) Beers Criteria are presented. Like the 2012 AGS Beers Criteria, they include lists of potentially inappropriate medications to be avoided in older adults. New to the criteria are lists of select drugs that should be avoided or have their dose adjusted based on the indiv ... 顯示更多

[出版商的全文](#) ... [相關記錄](#)

啟用 Windows

| 100 出版品 | 排序依據: 引用次數: 最優先                                                                                                                                                                                                                                                               | 引用文獻  |       |       |       |       |          |        |       |
|---------|-------------------------------------------------------------------------------------------------------------------------------------------------------------------------------------------------------------------------------------------------------------------------------|-------|-------|-------|-------|-------|----------|--------|-------|
|         |                                                                                                                                                                                                                                                                               | < 前一年 |       |       |       |       | 每年平均引用次數 | 總計     |       |
|         |                                                                                                                                                                                                                                                                               | 2018  | 2019  | 2020  | 2021  | 2022  |          |        |       |
| 總計      |                                                                                                                                                                                                                                                                               | 3,571 | 4,478 | 5,847 | 7,416 | 5,472 | 3,083.27 | 33,916 |       |
| 1       | American Geriatrics Society 2015 Updated Beers Criteria for Potentially Inappropriate Medication Use in Older Adults<br><a href="#">Radcliff, S; Yee, JB; (...); Beers, MH</a><br>Nov 2015   <a href="#">JOURNAL OF THE AMERICAN GERIATRICS SOCIETY</a> 63 (11), pp.2227-2246 |       | 373   | 419   | 310   | 375   | 290      | 272.88 | 2,183 |
| 2       | Clinical Practice Guidelines for the Management of Pain, Agitation, and Delirium in Adult Patients in the Intensive Care Unit<br><a href="#">Barr, J; Fraser, GL; (...); Jaeschke, R</a><br>Jan 2013   <a href="#">CRITICAL CARE MEDICINE</a> 41 (1), pp.263-306              |       | 281   | 260   | 197   | 178   | 139      | 211.2  | 2,112 |

Web of Science™ 檢索 辰宇王

進階檢索 > 查詢 PMID=( 23269131 or 2... > 查詢 PMID=( 23269131 or 2... > 引用文獻報告: PMID=( 23... > 引用文獻報告: PMID=( 23269131 or 26446832 or 23992774 or 24088092 or ...

### 引用文獻報告

PMID=( 23269131 or 26446832 or 23992774 or 24088092 or 25154820 or 32437679 or 30592986 or 30113379 or 30113371 or 32637987 or 22... 分析結果 建立追蹤

[匯出完整報告](#)

|                                                 |                                                                     |                                                                |                       |
|-------------------------------------------------|---------------------------------------------------------------------|----------------------------------------------------------------|-----------------------|
| <b>出版品</b><br><b>100</b><br>總計<br>從 1986 到 2022 | <b>引用文獻</b><br><b>22,873</b> 分析<br>總計<br><b>22,814</b> 分析<br>扣除自我引用 | <b>被引用次數</b><br><b>33,916</b><br>總計<br><b>33,697</b><br>扣除自我引用 | <b>100</b><br>H-Index |
|-------------------------------------------------|---------------------------------------------------------------------|----------------------------------------------------------------|-----------------------|

根據年分的被引用次數與出版品數量分布 下載

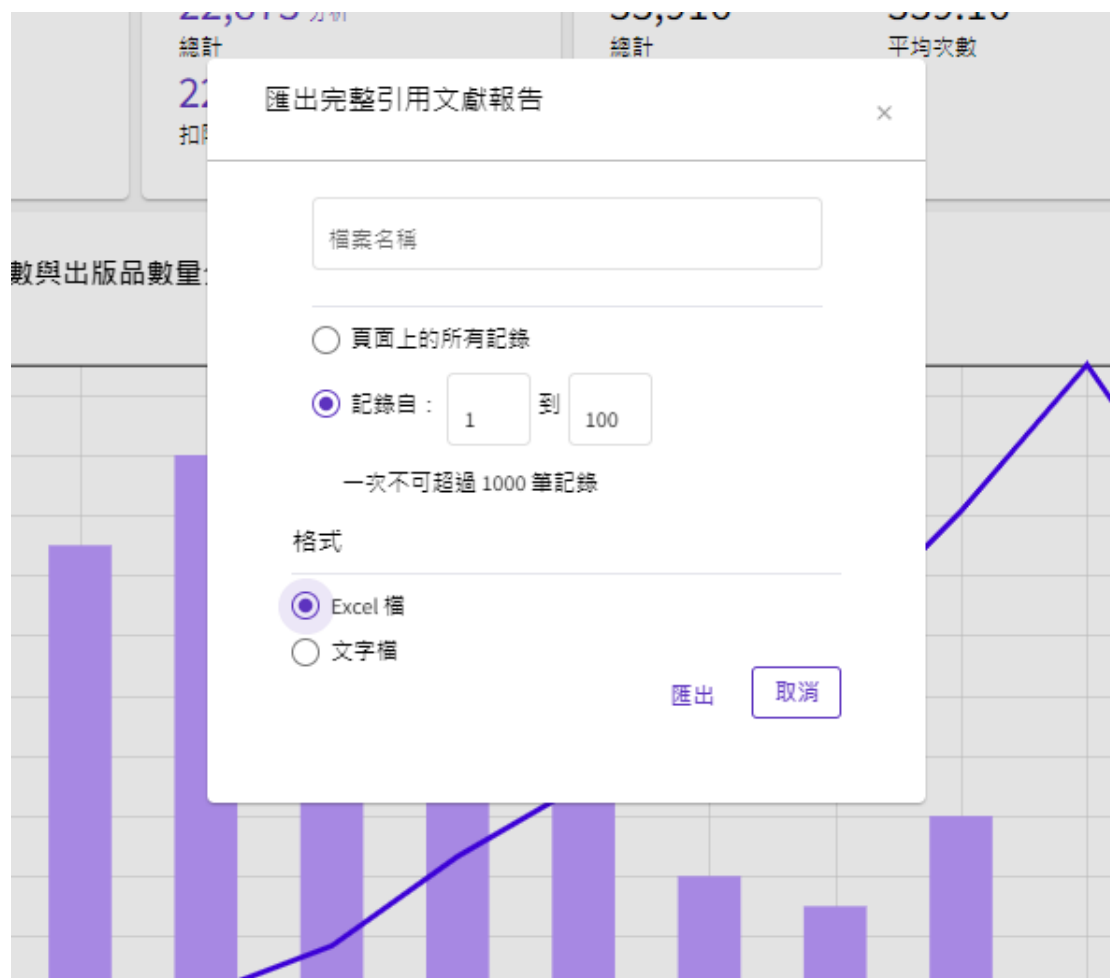

|    | A  | B                            | C     | D     | E  |
|----|----|------------------------------|-------|-------|----|
| 1  | aa | individual                   | group | value | id |
| 2  |    | 1 Publications of years      | A     | 50    | 1  |
| 3  |    | 2 Citations of years         | A     | 30    | 2  |
| 4  |    | 3 Publications of countries  | A     | 50    | 3  |
| 5  |    | 4 Publications of institute  | A     | 40    | 4  |
| 6  |    | 5 Publications of department | A     | 30    | 5  |
| 7  |    | 6 Publications of authors    | A     | 20    | 6  |
| 8  |    | 7 Publications of journal    | A     | 40    | 7  |
| 9  |    | 8 Citations of countries     | A     | 30    | 8  |
| 10 |    | 9 Citations of institute     | A     | 20    | 9  |
| 11 |    | 10 Citations of department   | A     | 10    | 10 |
| 12 |    | 11 Citations of authors      | A     | 10    | 11 |
| 13 |    | 12 Citations of journal      | A     | 40    | 12 |
| 14 |    | 13 RAs of countries          | A     | 20    | 13 |
| 15 |    | 14 RAs of institute          | A     | 10    | 14 |
| 16 |    | 15 RAs of department         | A     | 5     | 15 |
| 17 |    | 16 RAs of authors            | A     | 5     | 16 |
| 18 |    | 17 RAs of journal            | A     | 5     | 17 |
| 19 |    | 18                           | A     | 0     | 18 |
| 20 |    | 19                           | A     | 0     | 19 |

library(tidyverse)

data <-

```
data.frame(aa=c("1","2","3","4","5","6","7","8","9","10","11","12","13","14","15","16","17","18","19","20","21","22","23","24","25","26","27","28","29","30","31","32","33","34","35","36","37","38","39","40","41","42","43","44","45","46","47","48","49","50","51","52","53"), individual=c("Publications of years","Citations of years","Publications of countries","Publications of institute","Publications of department","Publications of authors","Publications of journal","Citations of countries","Citations of institute","Citations of department","Citations of authors","Citations of journal","RAs of countries","RAs of institute","RAs of department","RAs of authors","RAs of journal","","","","Clusters of country collaborations","Clusters of institute collaborations","Clusters of author collaborations","Clusters of keywords cword","Clusters of cited references","Clusters of cited keywords","Classifications of article themes","Classifications of countries by themes","Classifications of institutes by themes","Overall view using the Sankey","Comparison using pyramid","Simple impact beam plot","","","","Spots and trends of articles","Spots and trends of keywords","Publication trends of years","Citation trends of years","Predicting article
```

```

citations", "Counts in early and recent stages using forest plot", "Comparison using
forest plots", "Trends of articles using TBG or timeline map", "", "", "", "Articles worth
reading by citation trend", "Temporal heatmap for citation trend", "Impact beam plot
with bursr spots", "Theme and years for articles or keywords on a map", "", "", ""),
group=c("A", "A", "A",
"A", "B", "C", "C", "C", "C", "C", "C",
", "C", "C", "C", "C", "C", "D", "D", "D", "D", "D", "D", "D", "D"),
value=c(50,30,50,40,30,20,40,30,20,10,10,40,20,10,5,5,5,0,0,0,45,35,35,44,22,22,20,
10,5,3,15,6,0,0,0,22,47,41,41,11,11,11,20,0,0,0,18,15,0,0,0,92,91),
id=c(1,2,3,4,5,6,7,8,9,10,11,12,13,14,15,16,17,18,19,20,21,22,23,24,25,26,27,28,29,3
0,31,32,33,34,35,36,37,38,39,40,41,42,43,44,45,46,47,48,49,50,51,52,53))
# Create dataset
#data <- data.frame(

```

```

# Order data:
#data = data %>% arrange(group, value)
# Set a number of 'empty bar' to add at the end of each group
empty_bar <- 4
to_add <- data.frame( matrix(NA, empty_bar*nlevels(data$group), ncol(data)) )

```

```

colnames(to_add) <- colnames(data)

```

```

to_add$group <- rep(levels(data$group), each=empty_bar)
data <- rbind(data, to_add)
data <- data %>% arrange(group)
data$id <- seq(1, nrow(data))

```

```

# Get the name and the y position of each label
label_data <- data
number_of_bar <- nrow(label_data)
angle <- 90 - 360 * (label_data$id-0.5) / number_of_bar      # I subtract 0.5
because the letter must have the angle of the center of the bars. Not extreme
right(1) or extreme left (0)
label_data$hjust <- ifelse( angle < -90, 1, 0)

```





```

# Create data
#value1 <- abs(rnorm(26))*2
data <- data.frame(aa=c(1,2,3,4,5,6,7), x=c("1","2","3","4","5","6","7"),
value1=c(1,1,1,1,2,1,5), value2=c(10,10,10,10,10,10,10),
mymean2=c(1,1,4,5,5,10,11), value3=c(2,4,6,7,8,9,10), value4=c(2,4,6,7,9,9,11),
ipday=c(1,1,4,5,5,10,11), ipcase=c(1.79,1.48,1.98,1.95,1.85,2.06,2.28),
type=c(3,3,3,3,4,1,1), kcolor=c("1","1","1","1","5","3","3"))

```

```

# Reorder data using average? Learn more about reordering in chart #267

```

```

data <- data %>%
  rowwise() %>%
  mutate( mymean = mean(c(ipday,ipday) ) ) %>%
  arrange(desc(aa)) %>%

```

```

  mutate(x=factor(x, x))

```

```

# Plot

```

```

ggplot(data) +
  geom_segment( aes(x=x, xend=x, y=value1, yend=value2),
color="#33FFEE",size=1) +geom_segment( aes(x=x, xend=x, size=.2, y=value3,
yend=value4), color="red",size=2.1) +
  geom_point( aes(x=x, y=value3), color="red", size=1.1 ) +
  geom_point( aes(x=x, y=value2+1, size=ipcase, color=kcolor)) +
geom_point( aes(x=x, y=mymean), color=rgb(0.2,0.2,0.2,1.0), size=2.5 ) +
  coord_flip()+
  theme_ipsum() +
  theme(
    legend.position = "none",
  ) +
  xlab("") +
  ylab("Value of Y")

```

資料庫裡不明的字型系列  
`l(C_textBounds, as.graphicsAnnot(x$label), x`

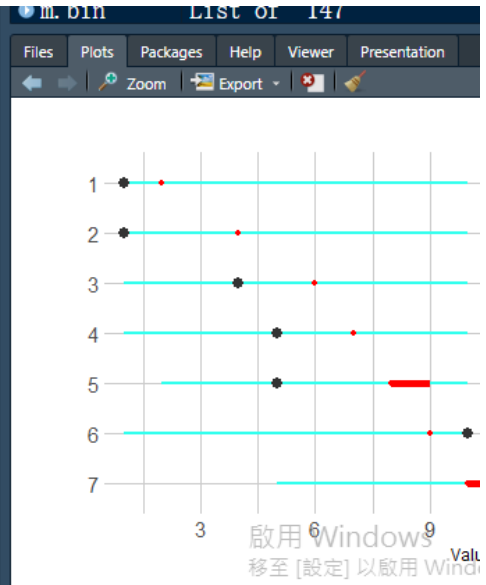

| K    | L    | M    | N    | O    | P    | Q    | R    | S    | T    | U |
|------|------|------|------|------|------|------|------|------|------|---|
| 2013 | 2014 | 2015 | 2016 | 2017 | 2018 | 2019 | 2020 | 2021 | 2022 |   |
| 0    | 0    | 2    | 138  | 276  | 373  | 419  | 310  | 375  | 290  |   |
| 102  | 189  | 207  | 270  | 289  | 281  | 260  | 197  | 178  | 139  |   |
| 0    | 36   | 87   | 140  | 150  | 191  | 242  | 271  | 305  | 235  |   |
| 3    | 73   | 110  | 138  | 147  | 177  | 174  | 195  | 240  | 153  |   |
| 0    | 1    | 64   | 149  | 174  | 177  | 178  | 155  | 126  | 76   |   |
| 0    | 0    | 0    | 0    | 0    | 0    | 0    | 203  | 484  | 319  |   |
| 0    | 0    | 0    | 0    | 0    | 0    | 70   | 261  | 341  | 267  |   |
| 0    | 0    | 0    | 0    | 0    | 3    | 57   | 191  | 214  | 139  |   |
| 0    | 0    | 0    | 0    | 0    | 0    | 0    | 0    | 213  | 367  |   |
| 0    | 0    | 0    | 0    | 0    | 0    | 0    | 95   | 303  | 163  |   |
| 20   | 46   | 52   | 51   | 49   | 68   | 60   | 60   | 58   | 45   |   |
| 0    | 0    | 0    | 3    | 18   | 53   | 88   | 101  | 133  | 94   |   |
| 0    | 0    | 4    | 34   | 50   | 57   | 48   | 80   | 110  | 67   |   |
| 0    | 0    | 4    | 34   | 50   | 57   | 48   | 80   | 110  | 67   |   |
| 0    | 0    | 5    | 31   | 47   | 47   | 66   | 85   | 85   | 83   |   |
| 0    | 0    | 0    | 0    | 16   | 34   | 82   | 95   | 110  | 99   |   |
| 0    | 0    | 4    | 81   | 102  | 70   | 56   | 53   | 37   | 22   |   |
| 0    | 0    | 9    | 27   | 42   | 51   | 53   | 75   | 84   | 53   |   |
| 11   | 33   | 25   | 38   | 34   | 42   | 66   | 61   | 52   | 31   |   |
| 0    | 0    | 0    | 0    | 0    | 23   | 66   | 84   | 107  | 84   |   |

| I  | J           | K   | L   | M   | N   | O    | P    | Q    | R    | S    | T    | U    |
|----|-------------|-----|-----|-----|-----|------|------|------|------|------|------|------|
| IP | 1.IP period | 1   | 2   | 3   | 4   | 5    | 6    | 7    | 8    | 9    | 10   | 11   |
| 3  | 2           | 0   | 0   | 2   | 140 | 416  | 789  | 1208 | 1518 | 1899 | 2183 | 2183 |
| 1  | 4           | 102 | 291 | 498 | 768 | 1057 | 1338 | 1598 | 1795 | 1973 | 2112 | 2112 |
| 5  | 6           | 0   | 36  | 123 | 263 | 413  | 604  | 846  | 1117 | 1422 | 1657 | 1657 |
| 8  | 7           | 3   | 76  | 186 | 324 | 471  | 648  | 822  | 1017 | 1257 | 1410 | 1410 |
| 3  | 8           | 0   | 1   | 65  | 214 | 388  | 565  | 743  | 898  | 1024 | 1100 | 1100 |
| 3  | 10          | 0   | 0   | 0   | 0   | 0    | 0    | 0    | 203  | 687  | 1006 | 1006 |
| 3  | 10          | 0   | 0   | 0   | 0   | 0    | 0    | 70   | 331  | 672  | 939  | 939  |
| 2  |             | 0   | 0   | 0   | 0   | 0    | 3    | 60   | 251  | 465  | 604  | 604  |
| 2  |             | 0   | 0   | 0   | 0   | 0    | 0    | 0    | 0    | 213  | 580  | 580  |
| 3  |             | 0   | 0   | 0   | 0   | 0    | 0    | 0    | 95   | 398  | 561  | 561  |
| 5  |             | 20  | 66  | 118 | 169 | 218  | 286  | 346  | 406  | 464  | 509  | 509  |
| 4  |             | 0   | 0   | 0   | 3   | 21   | 74   | 162  | 263  | 396  | 490  | 490  |
| 4  |             | 0   | 0   | 4   | 38  | 88   | 145  | 193  | 273  | 383  | 450  | 450  |
| 4  |             | 0   | 0   | 4   | 38  | 88   | 145  | 193  | 273  | 383  | 450  | 450  |
| 4  |             | 0   | 0   | 5   | 36  | 83   | 130  | 196  | 281  | 366  | 449  | 449  |
| 4  |             | 0   | 0   | 0   | 0   | 16   | 50   | 132  | 227  | 337  | 436  | 436  |
| 1  |             | 0   | 0   | 4   | 85  | 187  | 257  | 313  | 366  | 408  | 425  | 425  |
| 5  |             | 0   | 0   | 9   | 36  | 78   | 129  | 182  | 257  | 341  | 394  | 394  |
| 5  |             | 11  | 44  | 69  | 107 | 141  | 183  | 249  | 310  | 362  | 393  | 393  |
| 3  |             | 0   | 0   | 0   | 0   | 0    | 23   | 89   | 173  | 280  | 364  | 364  |
| 4  |             |     |     |     |     |      |      |      |      |      |      |      |
| 1  |             |     |     |     |     |      |      |      |      |      |      |      |
| 2  |             |     |     |     |     |      |      |      |      |      |      |      |

|    | A         | B         | C  | D      | E    | F       | G         | H         | I  | J           | K  | L   | M   | N   |   |
|----|-----------|-----------|----|--------|------|---------|-----------|-----------|----|-------------|----|-----|-----|-----|---|
| 1  | 798863.02 | a         | IP | ipcase | IRT2 | Gw      | IRT model | AAC at IP | IP | 1.IP period | ip | 1   | 2   | 3   | 4 |
| 2  | 1         | 0.2       | 8  | 3.46   | 4    | -0.23   | 2         | 0.65      | 3  |             | 2  | 0   | 0   | 2   |   |
| 3  | 1         | 0.14      | 7  | 3.35   | 3    | -0.98   | 4         | 0.58      | 1  |             | 4  | 102 | 291 | 498 |   |
| 4  | 1         | 0.17      | 8  | 3.25   | 4    | -0.51   | 4         | 0.59      | 5  |             | 6  | 0   | 36  | 123 |   |
| 5  | 1         | 24.33     | 4  | 4.77   | 4    | -0.48   | 5         | 0.71      | 8  |             | 7  | 3   | 76  | 186 |   |
| 6  | 2         | 0.18      | 7  | 2.99   | 4    | -0.99   | 6         | 0.64      | 3  |             | 8  | 0   | 1   | 65  |   |
| 7  | 1         | 0.54      | 9  | 3.42   | 1    | 0.41    | 8         | 1         | 3  |             | 10 | 0   | 0   | 0   |   |
| 8  | 5         | 0.41      | 9  | 3.53   | 1    | 0.07    | 9         | 1         | 3  |             | 10 | 0   | 0   | 0   |   |
| 9  | 7         | 0.41      | 9  | 3.39   | 4    | -0.68   |           | 0.81      | 2  |             |    | 0   | 0   | 0   |   |
| 10 | 6         | 1.58      | 9  | 4.08   | 1    | 1       |           | 1         | 2  |             |    | 0   | 0   | 0   |   |
| 11 | 7         | 0.6       | 9  | 3.11   | 1    | 0.32    |           | 1         | 3  |             |    | 0   | 0   | 0   |   |
| 12 | 7         | 0.13      | 7  | 2.57   | 4    | -0.92   |           | 0.56      | 5  |             |    | 20  | 66  | 118 |   |
| 13 | 6         | 0.26      | 9  | 2.91   | 4    | -0.17   |           | 0.69      | 4  |             |    | 0   | 0   | 0   |   |
| 14 | 7         | 0.19      | 8  | 2.84   | 4    | -0.29   |           | 0.57      | 4  |             |    | 0   | 0   | 4   |   |
| 15 | 3         | 0.19      | 8  | 2.84   | 4    | -0.29   |           | 0.57      | 4  |             |    | 0   | 0   | 4   |   |
| 16 | 7         | 0.19      | 8  | 2.85   | 4    | -0.87   |           | 0.6       | 4  |             |    | 0   | 0   | 5   |   |
| 17 | 7         | 0.27      | 9  | 2.82   | 1    | 0.26    |           | 0.73      | 4  |             |    | 0   | 0   | 0   |   |
| 18 | 6         | 0.2       | 7  | 2.7    | 3    | -1      |           | 0.69      | 1  |             |    | 0   | 0   | 4   |   |
| 19 | 5         | 0.19      | 8  | 2.58   | 4    | -0.69   |           | 0.62      | 5  |             |    | 0   | 0   | 9   |   |
| 20 | 7         | 0.15      | 8  | 2.41   | 4    | -0.97   |           | 0.57      | 5  |             |    | 11  | 44  | 69  |   |
| 21 | 5         | 0.31      | 9  | 3.08   | 5    | 0       |           | 0.66      | 3  |             |    | 0   | 0   | 0   |   |
| 22 | 2         | 0.3811979 | 7  | 2.98   | 1    | #DIV/0! |           | 0.57      | 4  |             |    |     |     |     |   |
| 23 | 5         | 0.6718427 | 9  | 3.47   | 1    | #DIV/0! |           | 0.63      | 1  |             |    |     |     |     |   |
